# Supplementary material for: Human electronegative low-density lipoprotein modulates cardiac repolarization via LOX-1-mediated alteration of sarcolemmal ion channels
Source: PubMed Central journal article supplement (PMC5589822; doi:10.1038/s41598-017-10503-x), 2017-09-07
Supplement: 41598_2017_10503_MOESM1_ESM.pdf [file 41598_2017_10503_MOESM1_ESM.pdf]

**Human electronegative low-density lipoprotein modulates cardiac repolarization  
via LOX-1-mediated alteration of sarcolemmal ion channels**

An-Sheng Lee, Yutao Xi, Chin-Hu Lai, Wei-Yu Chen, Hsien-Yu Peng, Hua-Chen  
Chan, Chu-Huang Chen, Kuan-Cheng Chang

## Supplementary Figures

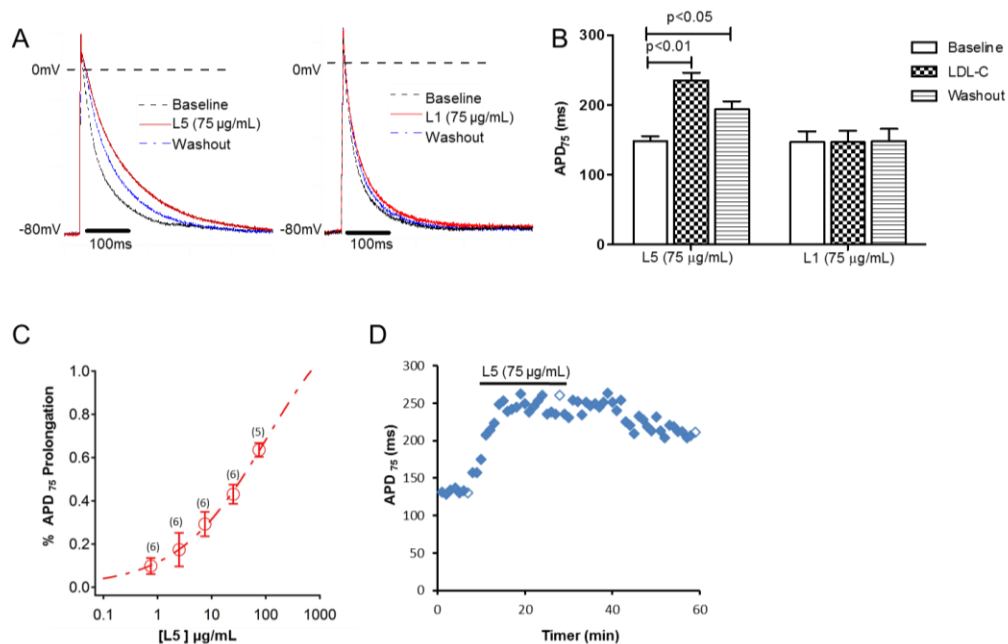

**Figure S1. Prolonged action potential duration (APD) in H9c2 cells treated with**

**L5. A**, Representative action potential traces of H9c2 cells at baseline, during

perfusion with 75 µg/mL L1 or L5, or after 30 min washout. **B**, Perfusion with L5

directly prolonged the APD of H9c2 cells, whereas perfusion with L1 did not. The

effects of L5 were only partially reversible. n=8 per group. **C**, L5 acutely prolonged

APD in a dose-dependent manner. The prolongation percentage (%) was calculated

with respect to the baseline value. When the data were fitted to the Hill Equation, the

half-maximal inhibitory concentration (IC<sub>50</sub>) was  $54.24 \pm 13.2$  µg/mL, and the Hill

coefficient was  $0.62 \pm 0.009$ . The n number of each concentration was shown in

quotes. **D**: Time-course analysis of the effect of L5 (75 µg/mL) on ADP showed that

L5 prolonged APD within 5 min.

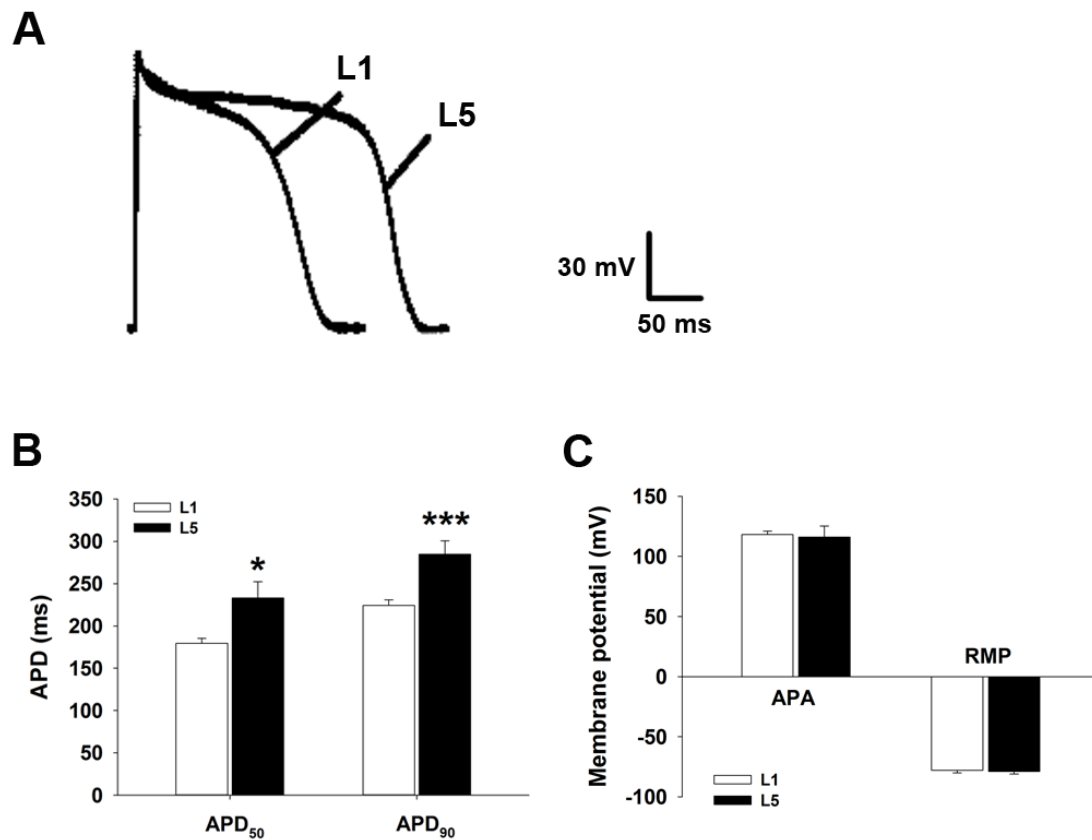

**Figure S2. L5-induced prolongation of action potential duration (APD) in ventricular myocytes isolated from guinea pigs.** **A**, Superimposed representative action potential traces were recorded from guinea pig cardiomyocytes treated with 30  $\mu\text{g}/\text{mL}$  L5 or L1. **B**, Comparison of the action potential duration at 50% (APD<sub>50</sub>) and 90% (APD<sub>90</sub>) repolarization between 2 groups of cardiomyocytes. **C**, Comparison of the action potential amplitude (APA) and the resting membrane potential (RMP) between 2 groups of cardiomyocytes.  $n=4$  per group. \* $P<0.05$  and \*\*\* $P<0.01$  vs. L1-treated cardiomyocytes.

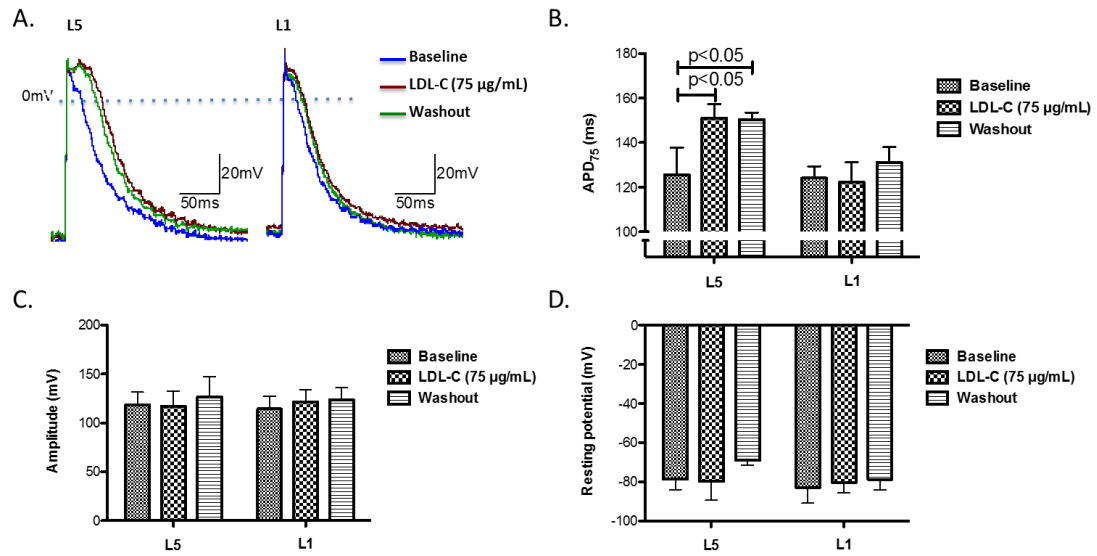

**Figure S3. L5-induced prolongation of action potential duration (APD) in**

**myocytes isolated from sheep. A,** Representative action potential traces were

recorded from sheep myocytes at baseline, during perfusion with 75 µg/mL L5 or L1,

and after washout. The direct effects of L5 or L1 perfusion on **(B)** APD, **(C)**

amplitude, and **(D)** resting potential in sheep myocytes. n=6 per group.

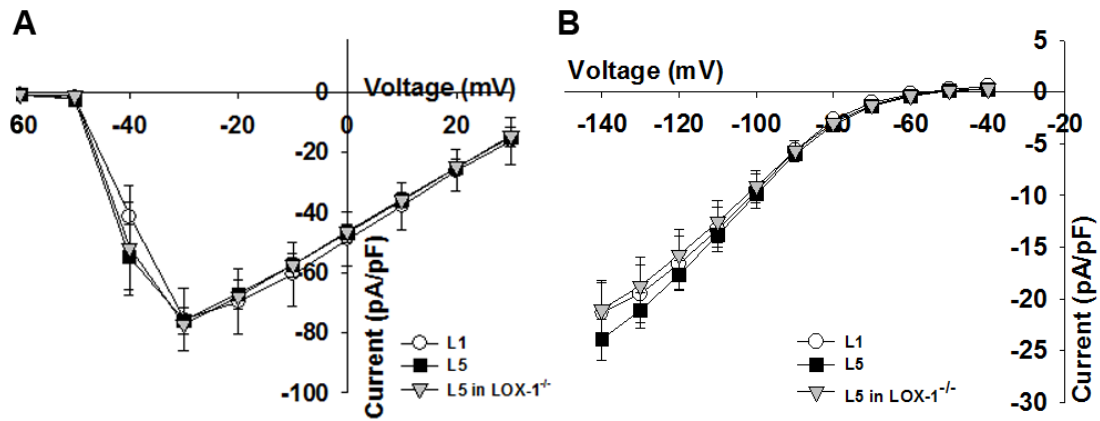

**Figure S4. Effect of L5 on sodium ( $I_{Na}$ ) and inward rectifier potassium current**

**( $I_{K1}$ ) in mice cardiomyocytes. A,** Comparison of the I-V relationships of  $I_{Na}$  between 3 groups of cardiomyocytes. n=3 per group. **B,** Comparison of the I-V relationships of  $I_{K1}$  between 3 groups of cardiomyocytes. n=6 per group.

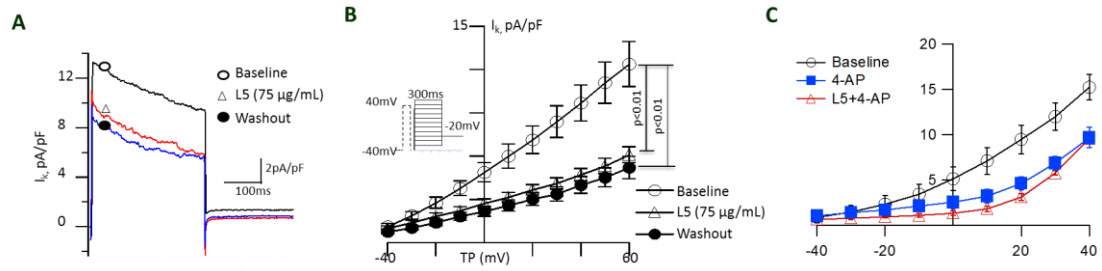

**Figure S5. Decreased 4-AP sensitive potassium current ( $I_K$ ) by L5 in H9c2 cells.**

**A**, Representative outward potassium currents were elicited with voltages ranging from  $-40$  mV to  $60$  mV (at  $10$ -mV intervals) from a holding potential of  $-40$  mV. **B**, Current-voltage relationship of  $I_K$ . **C**, 4-Aminopyridine was used to confirm the potassium current which L5 inhibits is 4-AP sensitive potassium currents.  $n=7$  per group.

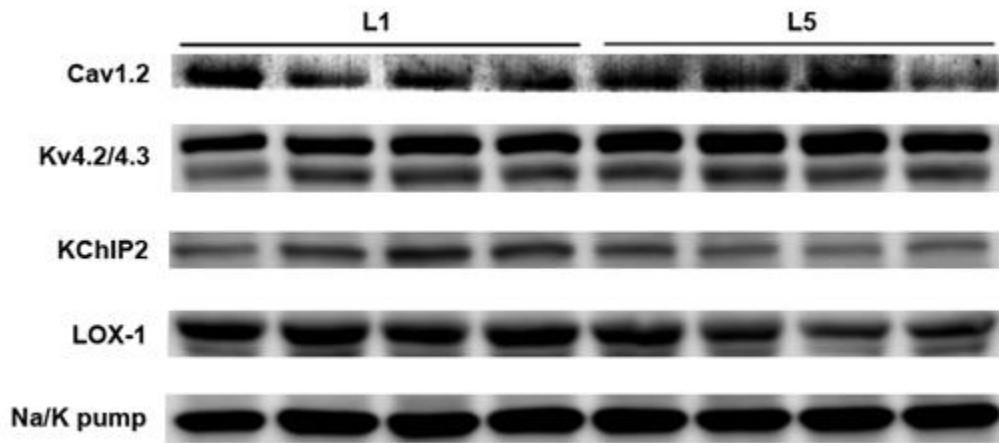

**Figure S6. Comparison of membrane fraction proteins between L1- and L5-treated rat ventricular myocytes.** It showed that there is no significant difference of Cav1.2, Kv4.2/4.3, KChIP2, and LOX-1 protein expression between 30 min L1- and L5-treated rat ventricular myocytes. Sodium-potassium ATPase (Na/K) was used as membrane fraction internal control.

## Supplementary Table

**Table S1. Effects of L5 on Electrocardiographic Parameters in Mice**

|                        | L1           | L5           | L5 in LOX-1 <sup>-/-</sup> |
|------------------------|--------------|--------------|----------------------------|
| Heart rate (beats/min) | 402.40±52.72 | 447.44±32.64 | 409.67±21.24               |
| RR interval (ms)       | 155.88±17.32 | 137.15±10.41 | 147.13±14.60               |
| PR interval (ms)       | 41.22±3.49   | 41.34±0.77   | 40.98±3.33                 |
| QRS interval (ms)      | 10.41±0.84   | 11.40±0.33   | 11.22±0.65                 |
| QT interval (ms)       | 17.53±0.54   | 18.81±1.96   | 16.61±1.82                 |
| QTc (ms)               | 14.30±1.12   | 17.77±0.94*  | 13.41±0.91 <sup>#</sup>    |

Values are means±S.E. QTc is calculated by the method according to Mitchell GF et

al. \* $P < 0.05$  vs. L1; <sup>#</sup> $P < 0.05$  vs. L5.
